# Supplementary material for: Evidence of long-term gene flow and selection during domestication from analyses of Eurasian wild and domestic pig genomes
Source: Springer Nature journal article supplement (doi:10.1038/ng.3394), 2015-08-31
Supplement: 41588_2015_BFng3394_MOESM46_ESM.xlsx [file 41588_2015_BFng3394_MOESM46_ESM.xlsx]

## Sheet: Figure5ab
Pop.	Pos.	CLR
EUD	82300369	105.814
EUD	82301369	98.4369
EUD	82302369	83.5549
EUD	82303369	27.9489
EUD	82304369	38.6265
EUD	82305369	28.3331
EUD	82306369	0.853724
EUD	82307369	1.68646
EUD	82308369	10.2503
EUD	82309369	61.0016
EUD	82310369	18.2409
EUD	82311369	0
EUD	82312369	0.856605
EUD	82313369	3.8718
EUD	82314369	5.55359
EUD	82315369	41.4831
EUD	82316369	35.1324
EUD	82317369	70.2413
EUD	82318369	147.304
EUD	82319369	170.459
EUD	82320369	188.428
EUD	82321369	89.2488
EUD	82322369	83.3276
EUD	82323369	108.013
EUD	82324369	87.8772
EUD	82325369	103.265
EUD	82326369	103.493
EUD	82327369	14.7988
EUD	82328369	0.0102782
EUD	82329369	0
EUD	82330369	25.5753
EUD	82331369	7.65952
EUD	82332369	53.6471
EUD	82333369	33.9867
EUD	82334369	0
EUD	82335369	7.5526
EUD	82336369	0.0370019
EUD	82337369	0.0292311
EUD	82338369	3.72613
EUD	82339369	0.388961
EUD	82340369	0.335214
EUD	82341369	0.0812973
EUD	82342369	0.754112
EUD	82343369	0.045875
EUD	82344369	0.24583
EUD	82345369	0.0195529
EUD	82346369	0.348061
EUD	82347369	0.0412508
EUD	82348369	1.53858
EUD	82349369	0.380422
EUD	82350369	1.7775
EUD	82351369	1.38385
EUD	82352369	0
EUD	82353369	0.0375482
EUD	82354369	0
EUD	82355369	0.00848168
EUD	82356369	0.0131484
EUD	82357369	0
EUD	82358369	0.0207774
EUD	82359369	1.38295
EUD	82360369	0.660244
EUD	82361369	0.00857047
EUD	82362369	0.216762
EUD	82363369	0.659917
EUD	82364369	0.0478581
EUD	82365369	0.114101
EUD	82366369	0.110902
EUD	82367369	3.47549
EUD	82368369	0.771918
EUD	82369369	1.53775
EUD	82370369	0.0107531
EUD	82371369	11.3142
EUD	82372369	80.2147
EUD	82373369	190.424
EUD	82374369	268.878
EUD	82375369	341.367
EUD	82376369	378.298
EUD	82377369	398.912
EUD	82378369	374.217
EUD	82379369	369.284
EUD	82380369	382.512
EUD	82381369	406.235
EUD	82382369	388.37
EUD	82383369	339.585
EUD	82384369	351.437
EUD	82385369	331.609
EUD	82386369	276.846
EUD	82387369	242.317
EUD	82388369	109.765
EUD	82389369	145.306
EUD	82390369	174.255
EUD	82391369	141.99
EUD	82392369	99.6133
EUD	82393369	81.2371
EUD	82394369	64.4151
EUD	82395369	28.3918
EUD	82396369	2.13357
EUD	82397369	0.00571201
EUD	82398369	0
EUD	82399369	0.0182957
EUD	82400369	0.165239
EUD	82401361	0.0156509
EUD	82402361	0.760645
EUD	82403361	0.266107
EUD	82404361	0.0211458
EUD	82405361	0.0657336
EUD	82406361	0.023283
EUD	82407361	5.83636
EUD	82408361	66.168
EUD	82409361	23.2017
EUD	82410361	138.085
EUD	82411361	83.7399
EUD	82412361	194.917
EUD	82413361	173.259
EUD	82414361	65.1086
EUD	82415361	120.692
EUD	82416361	128.477
EUD	82417361	256.142
EUD	82418361	346.338
EUD	82419361	408.744
EUD	82420361	461.62
EUD	82421361	506.382
EUD	82422361	540.357
EUD	82423361	587.359
EUD	82424361	632.797
EUD	82425361	678.216
EUD	82426361	718.707
EUD	82427361	750.789
EUD	82428361	774.706
EUD	82429361	811.158
EUD	82430361	838.536
EUD	82431361	860.46
EUD	82432361	877.503
EUD	82433361	877.787
EUD	82434361	899.048
EUD	82435361	944.288
EUD	82436361	972.457
EUD	82437361	993.95
EUD	82438361	1010.54
EUD	82439361	1019.58
EUD	82440361	1049.33
EUD	82441361	1062.68
EUD	82442361	1079.87
EUD	82443361	1092.96
EUD	82444361	1106.94
EUD	82445361	1118.14
EUD	82446361	1127.49
EUD	82447361	1133.14
EUD	82448361	1139.57
EUD	82449361	1146.58
EUD	82450361	1148.22
EUD	82451361	1158.86
EUD	82452361	1182.69
EUD	82453361	1195.53
EUD	82454361	1203.57
EUD	82455361	1200.59
EUD	82456361	1202.98
EUD	82457361	1234.31
EUD	82458361	1250.25
EUD	82459361	1263.57
EUD	82460361	1274.39
EUD	82461361	1283.47
EUD	82462361	1290.71
EUD	82463361	1296.57
EUD	82464361	1301.95
EUD	82465361	1306.99
EUD	82466361	1311.88
EUD	82467361	1316.45
EUD	82468361	1320.29
EUD	82469361	1322.88
EUD	82470361	1324.36
EUD	82471361	1323.67
EUD	82472361	1321.33
EUD	82473361	1284.5
EUD	82474361	1334.51
EUD	82475361	1346.75
EUD	82476361	1355.9
EUD	82477361	1363.68
EUD	82478361	1370.71
EUD	82479361	1377.09
EUD	82480361	1382.65
EUD	82481361	1387.19
EUD	82482361	1394.46
EUD	82483361	1400.43
EUD	82484361	1406.05
EUD	82485361	1411.39
EUD	82486361	1416.45
EUD	82487361	1420.93
EUD	82488361	1423.66
EUD	82489361	1429.82
EUD	82490361	1433.69
EUD	82491361	1436.11
EUD	82492361	1437.87
EUD	82493361	1438.61
EUD	82494361	1438.99
EUD	82495361	1436.41
EUD	82496361	1416.97
EUD	82497361	1445.26
EUD	82498361	1453.33
EUD	82499361	1452.37
EUD	82500361	1450.49
EUD	82501361	1454.08
EUD	82502361	1473.88
EUD	82503361	1479.05
EUD	82504361	1478.59
EUD	82505361	1506.17
EUD	82506361	1516.14
EUD	82507361	1537.06
EUD	82508361	1550.79
EUD	82509361	1562.69
EUD	82510361	1573.13
EUD	82511361	1582.68
EUD	82512361	1591.42
EUD	82513361	1599.13
EUD	82514361	1605.44
EUD	82515361	1607.71
EUD	82516361	1611.35
EUD	82517361	1630.64
EUD	82518361	1641.99
EUD	82519361	1649.4
EUD	82520361	1640.46
EUD	82521361	1669.4
EUD	82522361	1683.64
EUD	82523361	1695.08
EUD	82524361	1705.26
EUD	82525361	1713.88
EUD	82526361	1718.16
EUD	82527361	1735.04
EUD	82528361	1746.38
EUD	82529361	1756.12
EUD	82530361	1763.35
EUD	82531361	1772.25
EUD	82532361	1776.38
EUD	82533361	1782.41
EUD	82534361	1785.56
EUD	82535361	1782.85
EUD	82536361	1804.86
EUD	82537361	1817.04
EUD	82538361	1828
EUD	82539361	1837.26
EUD	82540361	1844.77
EUD	82541361	1850.55
EUD	82542361	1854.28
EUD	82543361	1856.18
EUD	82544361	1854.36
EUD	82545361	1846.8
EUD	82546361	1860.53
EUD	82547361	1864.26
EUD	82548361	1865.76
EUD	82549361	1865.15
EUD	82550361	1866.61
EUD	82551361	1859.12
EUD	82552361	1866.21
EUD	82553361	1869.71
EUD	82554361	1869.56
EUD	82555361	1865.71
EUD	82556361	1871.34
EUD	82557361	1873.43
EUD	82558361	1872.85
EUD	82559361	1869.89
EUD	82560361	1863.15
EUD	82561361	1847.96
EUD	82562361	1798.49
EUD	82563361	1848.25
EUD	82564361	1864.21
EUD	82565361	1879.84
EUD	82566361	1888.73
EUD	82567361	1893.87
EUD	82568361	1892.79
EUD	82569361	1898.25
EUD	82570361	1906.92
EUD	82571361	1906.31
EUD	82572361	1909.49
EUD	82573361	1919.9
EUD	82574361	1926.79
EUD	82575361	1929.88
EUD	82576361	1930.65
EUD	82577361	1928.88
EUD	82578361	1921.77
EUD	82579361	1920.98
EUD	82580361	1906.03
EUD	82581361	1913.44
EUD	82582361	1920.2
EUD	82583361	1919.8
EUD	82584361	1914.49
EUD	82585361	1913.41
EUD	82586361	1903.45
EUD	82587361	1866.13
EUD	82588361	1884.48
EUD	82589361	1868.48
EUD	82590361	1897.09
EUD	82591361	1897.05
EUD	82592361	1885.37
EUD	82593361	1891.14
EUD	82594361	1910.2
EUD	82595361	1914.78
EUD	82596361	1914.26
EUD	82597361	1910.78
EUD	82598361	1903.62
EUD	82599361	1914.56
EUD	82600361	1896.68
EUD	82601361	1909.47
EUD	82602361	1933.13
EUD	82603361	1939.82
EUD	82604361	1939.7
EUD	82605361	1899
EUD	82606361	1958
EUD	82607361	1965.31
EUD	82608361	1972.19
EUD	82609361	1980.67
EUD	82610361	1980.08
EUD	82611361	1996.91
EUD	82612361	2004.12
EUD	82613361	2008.03
EUD	82614361	2009.01
EUD	82615361	2005.44
EUD	82616361	1993.01
EUD	82617361	1998.31
EUD	82618361	1984.04
EUD	82619361	1978.65
EUD	82620361	1958.2
EUD	82621361	1975.65
EUD	82622361	1949.33
EUD	82623361	1951.8
EUD	82624361	1996.32
EUD	82625361	2018.55
EUD	82626361	2031.84
EUD	82627361	2040.4
EUD	82628361	2045.16
EUD	82629361	2045.31
EUD	82630361	2018.64
EUD	82631361	2050.22
EUD	82632361	2049.13
EUD	82633361	2057.12
EUD	82634361	2061.95
EUD	82635361	2055.98
EUD	82636361	2063.44
EUD	82637361	2070.08
EUD	82638361	2069.25
EUD	82639361	2066.1
EUD	82640361	2069.26
EUD	82641361	2051.59
EUD	82642361	2074.25
EUD	82643361	2077.52
EUD	82644361	2072.67
EUD	82645361	2076.01
EUD	82646361	2081.82
EUD	82647361	2080.52
EUD	82648361	2065.54
EUD	82649361	2079.5
EUD	82650361	2090.57
EUD	82651361	2095.57
EUD	82652361	2097.74
EUD	82653361	2097.56
EUD	82654361	2095.19
EUD	82655361	2089.31
EUD	82656361	2070.89
EUD	82657361	2079.76
EUD	82658361	2079.1
EUD	82659361	2068.83
EUD	82660361	2055.8
EUD	82661361	2053.19
EUD	82662361	2055.92
EUD	82663361	2050.91
EUD	82664361	2038.09
EUD	82665361	2024.48
EUD	82666361	1999.17
EUD	82667361	2004.77
EUD	82668361	1995.31
EUD	82669361	1981.48
EUD	82670361	1967.29
EUD	82671361	1964.62
EUD	82672361	1955.48
EUD	82673361	1938.78
EUD	82674361	1918.22
EUD	82675361	1890.89
EUD	82676361	1887.4
EUD	82677361	1862.87
EUD	82678361	1848.68
EUD	82679361	1825.14
EUD	82680361	1796.44
EUD	82681361	1761.17
EUD	82682361	1725.97
EUD	82683361	1691.77
EUD	82684361	1649.29
EUD	82685361	1607.53
EUD	82686361	1555.83
EUD	82687361	1502.71
EUD	82688361	1443.57
EUD	82689361	1373.7
EUD	82690361	1290.63
EUD	82691361	1188.31
EUD	82692361	1048.27
EUD	82693361	810.184
EUD	82694361	774.806
EUD	82695361	753.722
EUD	82696361	634.548
EUD	82697361	460.934
EUD	82698361	340.532
EUD	82699361	323.522
EUD	82700361	319.627
EUD	82701361	204.465
EUD	82702361	218.769
EUD	82703361	243.916
EUD	82704361	175.66
EUD	82705361	160.281
EUD	82706361	270.024
EUD	82707361	481.002
EUD	82708361	610.699
EUD	82709361	678.3
EUD	82710361	787.532
EUD	82711361	888.414
EUD	82712361	982.009
EUD	82713361	1074.86
EUD	82714361	1147.74
EUD	82715361	1201.98
EUD	82716361	1243.2
EUD	82717361	1267.88
EUD	82718361	1303.35
EUD	82719361	1329.31
EUD	82720361	1336.48
EUD	82721361	1355.74
EUD	82722361	1388.85
EUD	82723361	1407.73
EUD	82724361	1416.77
EUD	82725361	1425.86
EUD	82726361	1424.64
EUD	82727361	1420.79
EUD	82728361	1425.65
EUD	82729361	1424.7
EUD	82730361	1416.94
EUD	82731361	1406.01
EUD	82732361	1395.8
EUD	82733361	1379.64
EUD	82734361	1366.43
EUD	82735361	1345.34
EUD	82736361	1318.95
EUD	82737361	1279.1
EUD	82738361	1248.46
EUD	82739361	1203.53
EUD	82740361	1163.49
EUD	82741361	1108.53
EUD	82742361	1021.35
EUD	82743361	956.078
EUD	82744361	899.213
EUD	82745361	829.862
EUD	82746361	738.851
EUD	82747361	743.319
EUD	82748361	730.108
EUD	82749361	809.215
EUD	82750361	822.201
EUD	82751361	803.533
EUD	82752361	875.361
EUD	82753361	862.756
EUD	82754361	887.636
EUD	82755361	895.91
EUD	82756361	900.998
EUD	82757361	912.935
EUD	82758361	909.132
EUD	82759361	912.374
EUD	82760361	877.26
EUD	82761361	937.19
EUD	82762361	989.043
EUD	82763361	1011.3
EUD	82764361	1023
EUD	82765361	1028.65
EUD	82766361	1029.61
EUD	82767361	1026.83
EUD	82768361	1022.04
EUD	82769361	1014.54
EUD	82770361	1004.58
EUD	82771361	992.553
EUD	82772361	978.309
EUD	82773361	961.994
EUD	82774361	944.134
EUD	82775361	924.565
EUD	82776361	903.495
EUD	82777361	880.791
EUD	82778361	856.28
EUD	82779361	829.774
EUD	82780361	802.311
EUD	82781361	773.17
EUD	82782361	742.894
EUD	82783361	711.109
EUD	82784361	674.932
EUD	82785361	632.399
EUD	82786361	542.02
EUD	82787361	532.605
EUD	82788361	441.192
EUD	82789361	435.816
EUW	82300905	0
EUW	82301905	0.00831536
EUW	82302905	0.0418099
EUW	82303905	0.312554
EUW	82304905	0.388347
EUW	82305905	0
EUW	82306905	0
EUW	82307905	0
EUW	82308905	0
EUW	82309905	0
EUW	82310905	0
EUW	82311905	0.126283
EUW	82312905	0
EUW	82313905	0.0889459
EUW	82314905	0.0926554
EUW	82315905	0.110168
EUW	82316905	0.705507
EUW	82317905	0.135313
EUW	82318905	0.0958339
EUW	82319905	1.26183
EUW	82320905	0.115899
EUW	82321905	0
EUW	82322905	0.351494
EUW	82323897	0.189861
EUW	82324897	0.0786244
EUW	82325897	0.0353952
EUW	82326897	0.0176267
EUW	82327897	0.0145876
EUW	82328897	0
EUW	82329897	0.0738327
EUW	82330897	0.00253575
EUW	82331897	0
EUW	82332897	0.00287016
EUW	82333897	0
EUW	82334897	1.02714
EUW	82335897	0.0643979
EUW	82336897	0.583521
EUW	82337897	0.494346
EUW	82338897	0.0511155
EUW	82339897	0.0637283
EUW	82340897	3.08312
EUW	82341897	1.59606
EUW	82342897	0.165465
EUW	82343897	0.00734231
EUW	82344897	0.633968
EUW	82345897	0.0946666
EUW	82346897	0.62278
EUW	82347897	0.923832
EUW	82348897	0.599866
EUW	82349897	1.44929
EUW	82350897	3.48928
EUW	82351897	10.4342
EUW	82352897	0.81103
EUW	82353897	0
EUW	82354897	3.4547
EUW	82355897	0.00705813
EUW	82356897	0.785863
EUW	82357897	0
EUW	82358889	4.12293
EUW	82359889	1.28438
EUW	82360889	0.0234918
EUW	82361889	0.861418
EUW	82362889	0.0333209
EUW	82363889	1.78224
EUW	82364889	0.00410269
EUW	82365889	0
EUW	82366889	1.96476
EUW	82367889	5.23614
EUW	82368889	0.00395611
EUW	82369889	0.00395614
EUW	82370889	0.000427388
EUW	82371889	0.0608388
EUW	82372889	0.161712
EUW	82373889	0.417056
EUW	82374889	0.0255811
EUW	82375889	0.403877
EUW	82376889	0.0453374
EUW	82377889	0.0973236
EUW	82378889	0.0519231
EUW	82379889	0.138514
EUW	82380889	0.0580883
EUW	82381889	0.537122
EUW	82382889	0.0207729
EUW	82383889	0.0612886
EUW	82384889	0.873853
EUW	82385889	0.274338
EUW	82386889	0.144238
EUW	82387889	0.146741
EUW	82388889	0.0879355
EUW	82389889	0.066422
EUW	82390889	0.112837
EUW	82391889	0.0424733
EUW	82392881	0.130033
EUW	82393881	0.0432761
EUW	82394881	0.0200011
EUW	82395881	0.0440888
EUW	82396881	0.571693
EUW	82397881	0.000186185
EUW	82398881	1.67219
EUW	82399881	0.00904665
EUW	82400881	0.879038
EUW	82401881	3.37844
EUW	82402881	5.79721
EUW	82403881	8.11013
EUW	82404881	45.2444
EUW	82405881	1.51669
EUW	82406881	6.04184
EUW	82407881	8.00236
EUW	82408881	0.991373
EUW	82409881	0.245508
EUW	82410881	0.99142
EUW	82411881	20.7492
EUW	82412881	2.70041
EUW	82413881	3.87346
EUW	82414881	7.52958
EUW	82415881	0.609116
EUW	82416881	4.9558
EUW	82417881	0.0531232
EUW	82418881	7.80217
EUW	82419881	19.9323
EUW	82420881	28.3898
EUW	82421881	29.8703
EUW	82422881	15.7988
EUW	82423881	16.7836
EUW	82424881	0.0982733
EUW	82425881	4.15348
EUW	82426881	1.35735
EUW	82427873	11.5242
EUW	82428873	5.67342
EUW	82429873	3.10104
EUW	82430873	0.00463626
EUW	82431873	0.868717
EUW	82432873	1.43682
EUW	82433873	0.105633
EUW	82434873	0.0763337
EUW	82435873	0.0304272
EUW	82436873	0.631579
EUW	82437873	3.04975
EUW	82438873	0.501088
EUW	82439873	1.35118
EUW	82440873	1.04954
EUW	82441873	0.632999
EUW	82442873	0.299086
EUW	82443873	0.0730351
EUW	82444873	0.0444866
EUW	82445873	0.292271
EUW	82446873	0.461406
EUW	82447873	0.0608436
EUW	82448873	0.724702
EUW	82449873	0.129078
EUW	82450873	0.0591995
EUW	82451873	0.051709
EUW	82452873	0.0350992
EUW	82453873	0.00197773
EUW	82454873	0.723329
EUW	82455873	2.45424
EUW	82456873	0.40812
EUW	82457873	0.164073
EUW	82458873	5.682
EUW	82459873	7.86177
EUW	82460873	0.844076
EUW	82461865	0.431824
EUW	82462865	0.862973
EUW	82463865	0.0697008
EUW	82464865	0.0256807
EUW	82465865	0.284302
EUW	82466865	0
EUW	82467865	0
EUW	82468865	0
EUW	82469865	0.317957
EUW	82470865	0.380818
EUW	82471865	0
EUW	82472865	0.00229505
EUW	82473865	0.0595687
EUW	82474865	0.00229505
EUW	82475865	0.00794915
EUW	82476865	0.046918
EUW	82477865	0.0594272
EUW	82478865	0.123605
EUW	82479865	0.0647347
EUW	82480865	0.640421
EUW	82481865	0.0517396
EUW	82482865	0.0150603
EUW	82483865	0.0582078
EUW	82484865	0.0267484
EUW	82485865	0
EUW	82486865	0
EUW	82487865	0.00995355
EUW	82488865	0.0637625
EUW	82489865	0.0314184
EUW	82490865	0
EUW	82491865	0.933167
EUW	82492865	0
EUW	82493865	0.338827
EUW	82494865	0
EUW	82495865	0.099949
EUW	82496857	0.63862
EUW	82497857	2.58399
EUW	82498857	2.10521
EUW	82499857	0.00502208
EUW	82500857	0.367954
EUW	82501857	0.796851
EUW	82502857	6.6304
EUW	82503857	6.94253
EUW	82504857	10.0459
EUW	82505857	28.9483
EUW	82506857	33.4777
EUW	82507857	12.9239
EUW	82508857	8.40446
EUW	82509857	17.6519
EUW	82510857	29.0482
EUW	82511857	22.6976
EUW	82512857	18.4768
EUW	82513857	0.208572
EUW	82514857	0.0637283
EUW	82515857	0.464815
EUW	82516857	0.185323
EUW	82517857	1.69618
EUW	82518857	3.90277
EUW	82519857	1.30329
EUW	82520857	0
EUW	82521857	1.40803
EUW	82522857	1.37518
EUW	82523857	3.20197
EUW	82524857	11.0985
EUW	82525857	0.00428002
EUW	82526857	0.756965
EUW	82527857	0.672259
EUW	82528857	0.816077
EUW	82529857	0.90344
EUW	82530849	0.510283
EUW	82531849	0.652115
EUW	82532849	0.938275
EUW	82533849	0.664864
EUW	82534849	0.491623
EUW	82535849	1.66014
EUW	82536849	6.73019
EUW	82537849	0.901333
EUW	82538849	0.857579
EUW	82539849	6.20665
EUW	82540849	4.8603
EUW	82541849	2.71925
EUW	82542849	0.839779
EUW	82543849	1.18838
EUW	82544849	0.0907922
EUW	82545849	0.274166
EUW	82546849	0.166324
EUW	82547849	0.15769
EUW	82548849	2.7481
EUW	82549849	0.0729029
EUW	82550849	0.152018
EUW	82551849	0.104291
EUW	82552849	1.03034
EUW	82553849	1.57577
EUW	82554849	0.968482
EUW	82555849	1.64909
EUW	82556849	0.602556
EUW	82557849	0.51404
EUW	82558849	0.117395
EUW	82559849	0.0213792
EUW	82560849	0.704773
EUW	82561849	0.473261
EUW	82562849	2.2484
EUW	82563849	1.28676
EUW	82564849	0.849855
EUW	82565841	0.801152
EUW	82566841	0.780189
EUW	82567841	0.795628
EUW	82568841	2.86552
EUW	82569841	2.2604
EUW	82570841	0.224977
EUW	82571841	0
EUW	82572841	0
EUW	82573841	3.0268
EUW	82574841	3.12263
EUW	82575841	1.99312
EUW	82576841	2.04189
EUW	82577841	1.53341
EUW	82578841	1.29786
EUW	82579841	1.655
EUW	82580841	2.50063
EUW	82581841	0.596872
EUW	82582841	0.620257
EUW	82583841	0.000158559
EUW	82584841	0.600274
EUW	82585841	0
EUW	82586841	1.14548
EUW	82587841	0.707115
EUW	82588841	0.0368509
EUW	82589841	0
EUW	82590841	0.72772
EUW	82591841	0.00502208
EUW	82592841	0.00697242
EUW	82593841	0.533154
EUW	82594841	0.197297
EUW	82595841	0.51902
EUW	82596841	0
EUW	82597841	5.79822e-06
EUW	82598841	1.35089
EUW	82599841	0.0092202
EUW	82600833	0.0132622
EUW	82601833	0.0211527
EUW	82602833	0
EUW	82603833	0
EUW	82604833	0
EUW	82605833	0
EUW	82606833	0
EUW	82607833	0
EUW	82608833	0
EUW	82609833	0
EUW	82610833	0
EUW	82611833	0.460738
EUW	82612833	0
EUW	82613833	0
EUW	82614833	0.00864704
EUW	82615833	0.00866979
EUW	82616833	0.00764338
EUW	82617833	0.445406
EUW	82618833	0.273081
EUW	82619833	0.0146368
EUW	82620833	0.0543213
EUW	82621833	2.72154
EUW	82622833	0.0654417
EUW	82623833	1.28644
EUW	82624833	0.766115
EUW	82625833	0.386381
EUW	82626833	0.138606
EUW	82627833	0.0590353
EUW	82628833	0.0408955
EUW	82629833	0.0478051
EUW	82630833	0.749807
EUW	82631833	0
EUW	82632833	2.73718e-05
EUW	82633833	0.00110972
EUW	82634825	0.000245926
EUW	82635825	0.0108538
EUW	82636825	0
EUW	82637825	0.547451
EUW	82638825	0
EUW	82639825	0
EUW	82640825	0
EUW	82641825	0
EUW	82642825	0
EUW	82643825	0
EUW	82644825	0
EUW	82645825	0.492115
EUW	82646825	0
EUW	82647825	0
EUW	82648825	0.0209518
EUW	82649825	0.190318
EUW	82650825	1.55961
EUW	82651825	1.24411
EUW	82652825	0.27105
EUW	82653825	0.113964
EUW	82654825	0.105577
EUW	82655825	0.0313549
EUW	82656825	0.0238405
EUW	82657825	0
EUW	82658825	0.00410272
EUW	82659825	3.13871
EUW	82660825	0.237193
EUW	82661825	0.0648389
EUW	82662825	0.109806
EUW	82663825	0.331237
EUW	82664825	0.121607
EUW	82665825	0
EUW	82666825	0.0926323
EUW	82667825	0.733011
EUW	82668825	0
EUW	82669817	0.00501308
EUW	82670817	0.0858377
EUW	82671817	1.28619
EUW	82672817	1.33399
EUW	82673817	0.0162455
EUW	82674817	0.0771132
EUW	82675817	0.771942
EUW	82676817	0.209221
EUW	82677817	0.829053
EUW	82678817	0.304391
EUW	82679817	0.230146
EUW	82680817	0.356212
EUW	82681817	0.0773308
EUW	82682817	0.415702
EUW	82683817	1.06519
EUW	82684817	0.978754
EUW	82685817	0.154345
EUW	82686817	0.051418
EUW	82687817	3.98287
EUW	82688817	17.0351
EUW	82689817	14.2488
EUW	82690817	30.5043
EUW	82691817	43.6837
EUW	82692817	54.1539
EUW	82693817	35.5641
EUW	82694817	30.5747
EUW	82695817	1.75907
EUW	82696817	0.174365
EUW	82697817	0.0926323
EUW	82698817	0.000777704
EUW	82699817	0.101476
EUW	82700817	0.0812273
EUW	82701817	0.426265
EUW	82702817	0.100554
EUW	82703809	0.314583
EUW	82704809	0.152221
EUW	82705809	0.50634
EUW	82706809	2.95702
EUW	82707809	0.013519
EUW	82708809	0.125791
EUW	82709809	0.168709
EUW	82710809	0.183578
EUW	82711809	0.206911
EUW	82712809	0
EUW	82713809	4.8342
EUW	82714809	0.978535
EUW	82715809	16.0422
EUW	82716809	18.051
EUW	82717809	3.98549
EUW	82718809	36.1017
EUW	82719809	35.8058
EUW	82720809	10.7368
EUW	82721809	2.8064
EUW	82722809	35.252
EUW	82723809	36.6798
EUW	82724809	35.2705
EUW	82725809	21.4878
EUW	82726809	1.0515
EUW	82727809	0.00930377
EUW	82728809	0.799983
EUW	82729809	2.08025
EUW	82730809	4.86205
EUW	82731809	0.423589
EUW	82732809	0.058016
EUW	82733809	7.59523
EUW	82734809	21.2994
EUW	82735809	19.974
EUW	82736809	7.54512
EUW	82737809	0.243459
EUW	82738801	1.29219
EUW	82739801	0.26486
EUW	82740801	0.00389498
EUW	82741801	9.4718
EUW	82742801	5.526
EUW	82743801	1.54356
EUW	82744801	0.395245
EUW	82745801	6.21945
EUW	82746801	7.02366
EUW	82747801	5.00221
EUW	82748801	0.615619
EUW	82749801	16.264
EUW	82750801	0.41501
EUW	82751801	4.48649
EUW	82752801	0.377349
EUW	82753801	0.28555
EUW	82754801	1.24745
EUW	82755801	1.58723
EUW	82756801	17.4404
EUW	82757801	5.96144
EUW	82758801	5.98567
EUW	82759801	5.84787
EUW	82760801	0.226055
EUW	82761801	2.00668
EUW	82762801	6.33231
EUW	82763801	25.4614
EUW	82764801	37.7086
EUW	82765801	46.0915
EUW	82766801	51.828
EUW	82767801	55.7337
EUW	82768801	58.1597
EUW	82769801	59.3429
EUW	82770801	59.5205
EUW	82771801	58.6484
EUW	82772793	56.9843
EUW	82773793	54.3136
EUW	82774793	50.6548
EUW	82775793	46.008
EUW	82776793	40.2353
EUW	82777793	33.2641
EUW	82778793	24.9761
EUW	82779793	15.2325
EUW	82780793	4.012
EUW	82781793	2.10087
EUW	82782793	0.922431
EUW	82783793	0.821055
EUW	82784793	0.943231
EUW	82785793	3.02734
EUW	82786793	0.14741
EUW	82787793	0.551437
EUW	82788793	0.848467
EUW	82789793	3.46678
ASD	82300353	0.391912
ASD	82301353	1.82987
ASD	82302353	2.69042
ASD	82303353	1.47954e-08
ASD	82304353	0.118889
ASD	82305353	0.189587
ASD	82306353	0.59244
ASD	82307353	1.12835
ASD	82308353	0.31426
ASD	82309353	0.514657
ASD	82310353	5.8917
ASD	82311353	13.8613
ASD	82312353	0.00973888
ASD	82313353	7.86949
ASD	82314353	0.609857
ASD	82315353	2.37986
ASD	82316353	0.833591
ASD	82317353	0.047937
ASD	82318353	0.615208
ASD	82319353	0.0220023
ASD	82320353	0.0960562
ASD	82321353	0.115204
ASD	82322353	0.0321974
ASD	82323353	7.53419e-09
ASD	82324353	7.72286e-09
ASD	82325353	0.254288
ASD	82326353	6.14569
ASD	82327353	0.567809
ASD	82328353	4.15773
ASD	82329353	3.43049
ASD	82330353	2.35524
ASD	82331353	0.739554
ASD	82332353	0.251143
ASD	82333353	22.0112
ASD	82334353	14.4614
ASD	82335353	0.666091
ASD	82336353	36.0076
ASD	82337353	41.9878
ASD	82338353	39.7995
ASD	82339353	1.87211
ASD	82340353	17.4433
ASD	82341353	1.23792
ASD	82342353	2.79885
ASD	82343353	7.837e-09
ASD	82344353	1.30164
ASD	82345353	0.193843
ASD	82346353	0.291495
ASD	82347353	0.0910558
ASD	82348353	0.0154514
ASD	82349353	7.72286e-09
ASD	82350353	7.46568
ASD	82351353	36.3359
ASD	82352353	38.1231
ASD	82353353	10.6888
ASD	82354353	17.8907
ASD	82355353	0.932237
ASD	82356353	4.71092
ASD	82357353	0.964005
ASD	82358353	3.69991
ASD	82359353	7.72286e-09
ASD	82360353	1.43946
ASD	82361353	10.3742
ASD	82362353	8.35697
ASD	82363353	0.0123655
ASD	82364353	0.0709615
ASD	82365353	3.52829
ASD	82366353	11.7271
ASD	82367353	5.2962e-05
ASD	82368353	2.79396
ASD	82369353	0.473972
ASD	82370353	1.9782
ASD	82371353	0.0765542
ASD	82372353	2.59592
ASD	82373353	12.0767
ASD	82374353	35.1416
ASD	82375353	35.7786
ASD	82376353	59.2207
ASD	82377353	116.676
ASD	82378353	116.982
ASD	82379353	140.285
ASD	82380353	122.944
ASD	82381353	121.39
ASD	82382353	73.6796
ASD	82383353	3.43216
ASD	82384353	1.90813
ASD	82385353	0.858402
ASD	82386353	1.85101
ASD	82387353	12.6893
ASD	82388353	10.7586
ASD	82389353	30.1679
ASD	82390353	4.50828
ASD	82391353	22.012
ASD	82392353	19.9957
ASD	82393353	7.92312
ASD	82394353	3.70483
ASD	82395353	0.0535605
ASD	82396353	0.021781
ASD	82397353	2.92592
ASD	82398353	1.96396
ASD	82399353	0.112131
ASD	82400353	0.0212609
ASD	82401353	25.0421
ASD	82402353	26.7526
ASD	82403353	10.8357
ASD	82404353	5.78498
ASD	82405353	23.853
ASD	82406353	5.57885
ASD	82407353	86.3833
ASD	82408353	97.5045
ASD	82409353	57.0889
ASD	82410353	98.2172
ASD	82411353	103.069
ASD	82412353	64.9678
ASD	82413353	4.17257
ASD	82414353	1.80334
ASD	82415353	1.06189
ASD	82416353	9.86075
ASD	82417353	44.3833
ASD	82418353	46.7124
ASD	82419353	1.00576
ASD	82420353	1.15495
ASD	82421353	0.956058
ASD	82422353	0.263142
ASD	82423353	6.56701
ASD	82424353	0.463301
ASD	82425353	3.08755
ASD	82426353	0.540443
ASD	82427353	2.28098
ASD	82428353	0.0184331
ASD	82429353	7.72286e-09
ASD	82430353	0.0314986
ASD	82431353	0.461013
ASD	82432353	0.0462093
ASD	82433353	0.103681
ASD	82434353	0.329141
ASD	82435353	0.00193644
ASD	82436353	0.0448766
ASD	82437353	0.047937
ASD	82438353	0.0100227
ASD	82439353	7.751e-09
ASD	82440353	5.2122e-05
ASD	82441353	0.0481523
ASD	82442353	0.11445
ASD	82443353	0.0257776
ASD	82444353	2.54244
ASD	82445353	0.0047489
ASD	82446353	0.627555
ASD	82447353	0.0367214
ASD	82448353	0.0817251
ASD	82449353	0.031873
ASD	82450353	0.0307397
ASD	82451353	0.037427
ASD	82452353	0.16094
ASD	82453353	7.837e-09
ASD	82454353	0.183135
ASD	82455353	0.146747
ASD	82456353	0.466002
ASD	82457353	0.277585
ASD	82458353	7.72286e-09
ASD	82459353	7.53419e-09
ASD	82460353	0.0507397
ASD	82461353	0.0498739
ASD	82462353	0.00988165
ASD	82463353	0.09409
ASD	82464353	0.00768133
ASD	82465353	0.369085
ASD	82466353	0.259402
ASD	82467353	0.00828454
ASD	82468353	7.837e-09
ASD	82469353	0.0336301
ASD	82470353	0.0391409
ASD	82471353	1.44999
ASD	82472353	0.0558261
ASD	82473353	5.35033
ASD	82474353	3.09601
ASD	82475353	7.83699e-09
ASD	82476353	16.7081
ASD	82477353	16.2467
ASD	82478353	1.92149
ASD	82479353	2.12122
ASD	82480353	2.48718
ASD	82481353	1.51831
ASD	82482353	1.0409
ASD	82483353	5.13813
ASD	82484353	4.61885
ASD	82485353	0.127192
ASD	82486353	0.0891196
ASD	82487353	0.103302
ASD	82488353	5.80962e-05
ASD	82489353	7.53419e-09
ASD	82490353	0.051782
ASD	82491353	0.0100358
ASD	82492353	0.0100357
ASD	82493353	1.0154
ASD	82494353	0.572412
ASD	82495353	0.117381
ASD	82496353	1.93973
ASD	82497353	7.00643
ASD	82498353	1.26883
ASD	82499353	2.38115
ASD	82500353	7.61998
ASD	82501353	10.9135
ASD	82502353	12.4533
ASD	82503353	0.587901
ASD	82504353	0.809126
ASD	82505353	0.901762
ASD	82506353	2.5723
ASD	82507353	0.0180308
ASD	82508353	5.90113
ASD	82509353	2.48843
ASD	82510353	5.95714
ASD	82511353	0.0100358
ASD	82512353	0.543224
ASD	82513353	0.223938
ASD	82514353	0.758193
ASD	82515353	0.0481904
ASD	82516345	0.721025
ASD	82517345	0.0140977
ASD	82518345	0.524723
ASD	82519345	0.0249957
ASD	82520345	0.0154008
ASD	82521345	0.0309818
ASD	82522345	0.471256
ASD	82523345	0.770892
ASD	82524345	0.00691234
ASD	82525345	0.933075
ASD	82526345	0.0066324
ASD	82527345	0.0317903
ASD	82528345	3.29498
ASD	82529345	0.159886
ASD	82530345	0.154627
ASD	82531345	0.617668
ASD	82532345	7.837e-09
ASD	82533345	0.0158374
ASD	82534345	1.01689
ASD	82535345	0.0599036
ASD	82536345	7.99714e-09
ASD	82537345	0.0557486
ASD	82538345	7.89383e-09
ASD	82539345	0.024425
ASD	82540345	0.0728415
ASD	82541345	7.837e-09
ASD	82542345	7.44056e-09
ASD	82543345	0.229476
ASD	82544345	0.0579879
ASD	82545345	0.249918
ASD	82546345	0.096445
ASD	82547345	0.354141
ASD	82548345	7.751e-09
ASD	82549345	0.0346325
ASD	82550345	0.705745
ASD	82551345	0.165217
ASD	82552345	1.98167e-05
ASD	82553345	0.0571887
ASD	82554345	0.0684687
ASD	82555345	0.100693
ASD	82556345	1.7967
ASD	82557345	7.53419e-09
ASD	82558345	0.0666837
ASD	82559345	0.0708176
ASD	82560345	0.368755
ASD	82561345	0.0725245
ASD	82562345	9.87528e-05
ASD	82563345	0.0110274
ASD	82564345	7.53419e-09
ASD	82565345	0.488762
ASD	82566345	0.189341
ASD	82567345	0.0312451
ASD	82568345	0.61293
ASD	82569345	7.53419e-09
ASD	82570345	1.01127
ASD	82571345	1.48105
ASD	82572345	0.0360036
ASD	82573345	7.53419e-09
ASD	82574345	12.9031
ASD	82575345	2.91234
ASD	82576345	0.0411504
ASD	82577345	0.0221254
ASD	82578345	0.0604105
ASD	82579345	0.0379279
ASD	82580345	0.0605871
ASD	82581345	1.87977
ASD	82582345	0.0510682
ASD	82583345	7.53419e-09
ASD	82584345	0.0516703
ASD	82585345	7.92735e-09
ASD	82586345	0.0310317
ASD	82587345	0.243951
ASD	82588345	0.0217844
ASD	82589345	7.53419e-09
ASD	82590345	1.34253e-08
ASD	82591345	0.772786
ASD	82592345	7.53419e-09
ASD	82593345	0.0392089
ASD	82594345	0.00882146
ASD	82595345	0.643124
ASD	82596345	0.0350835
ASD	82597345	0.946858
ASD	82598345	0.0548704
ASD	82599345	0.00302336
ASD	82600345	0.00688576
ASD	82601345	0.958558
ASD	82602345	0.00613584
ASD	82603345	0.504821
ASD	82604345	0.139903
ASD	82605345	1.57045
ASD	82606345	0.355719
ASD	82607345	1.17452
ASD	82608345	0.178426
ASD	82609345	0.627291
ASD	82610345	0.0649175
ASD	82611345	0.0565647
ASD	82612345	0.590712
ASD	82613345	2.98365e-05
ASD	82614345	2.68894
ASD	82615345	0.0881303
ASD	82616345	0.449954
ASD	82617345	0.0243223
ASD	82618345	2.73845
ASD	82619345	0.51489
ASD	82620345	0.00287555
ASD	82621345	2.91376
ASD	82622345	0.0193656
ASD	82623345	0.737303
ASD	82624345	2.21495e-05
ASD	82625345	0.129236
ASD	82626345	0.000411061
ASD	82627345	4.98542
ASD	82628345	22.453
ASD	82629345	21.5189
ASD	82630345	29.7393
ASD	82631345	0.320304
ASD	82632345	28.6583
ASD	82633345	16.0324
ASD	82634345	33.0895
ASD	82635345	4.30796
ASD	82636345	1.90961
ASD	82637345	0.415817
ASD	82638345	2.16539
ASD	82639345	2.54798
ASD	82640345	0.623853
ASD	82641345	1.63651
ASD	82642345	0.0376263
ASD	82643345	0.0212641
ASD	82644345	0.730739
ASD	82645345	0.104282
ASD	82646345	1.80767
ASD	82647345	0.949809
ASD	82648345	0.0365869
ASD	82649345	0.00703945
ASD	82650345	0.0168944
ASD	82651345	0.170667
ASD	82652345	0.0155928
ASD	82653345	0.199938
ASD	82654345	1.54925e-08
ASD	82655345	0.0787463
ASD	82656345	1.67265
ASD	82657345	1.79058
ASD	82658345	0.00883476
ASD	82659345	0.448281
ASD	82660345	0.415863
ASD	82661345	0.494907
ASD	82662345	7.837e-09
ASD	82663345	0.130068
ASD	82664345	0.249655
ASD	82665345	0.825772
ASD	82666345	0.833948
ASD	82667345	0.0197944
ASD	82668345	0.237765
ASD	82669345	0.443685
ASD	82670345	0.326978
ASD	82671345	0.343099
ASD	82672345	0.0153346
ASD	82673345	0.0806045
ASD	82674345	0.208822
ASD	82675345	0.00739512
ASD	82676345	2.22689
ASD	82677345	12.2851
ASD	82678345	14.4123
ASD	82679345	2.18387
ASD	82680345	0.0358101
ASD	82681345	0.0559018
ASD	82682345	0.148636
ASD	82683345	0.582622
ASD	82684345	0.0194134
ASD	82685345	0.0604717
ASD	82686345	0.0068859
ASD	82687345	3.44455
ASD	82688345	0.761437
ASD	82689345	0.297045
ASD	82690345	0.430436
ASD	82691345	0.0155113
ASD	82692345	0.997569
ASD	82693345	0.316812
ASD	82694345	0.0215581
ASD	82695345	0.845271
ASD	82696345	2.06292
ASD	82697345	2.20494
ASD	82698345	3.67683
ASD	82699345	0.154432
ASD	82700345	0.00623143
ASD	82701345	0.694272
ASD	82702345	0.0367214
ASD	82703345	0.696357
ASD	82704345	9.03308
ASD	82705345	14.1204
ASD	82706345	7.53419e-09
ASD	82707345	0.198841
ASD	82708345	0.082447
ASD	82709345	7.27949
ASD	82710345	0.233366
ASD	82711345	7.53419e-09
ASD	82712345	7.72286e-09
ASD	82713345	0.0236151
ASD	82714345	0.0404224
ASD	82715345	0.0996759
ASD	82716345	0.537746
ASD	82717345	0.0859046
ASD	82718345	1.04752
ASD	82719345	0.475955
ASD	82720345	3.93614
ASD	82721345	1.34002
ASD	82722345	0.316781
ASD	82723345	0.0365793
ASD	82724345	7.42346e-09
ASD	82725345	7.837e-09
ASD	82726345	0.996807
ASD	82727345	1.58995
ASD	82728345	0.0512997
ASD	82729345	0.0558707
ASD	82730345	7.37355e-09
ASD	82731345	0.671598
ASD	82732345	0.014453
ASD	82733345	1.93621
ASD	82734345	0.0100359
ASD	82735345	0.30352
ASD	82736345	0.474895
ASD	82737345	0.0228836
ASD	82738345	0.391307
ASD	82739345	0.0527024
ASD	82740345	3.80868
ASD	82741345	4.71523
ASD	82742345	0.0296188
ASD	82743345	0.060919
ASD	82744345	0.0199692
ASD	82745345	0.0367961
ASD	82746345	0.691379
ASD	82747345	4.00154
ASD	82748345	1.66837
ASD	82749345	0.164211
ASD	82750345	0.002851
ASD	82751345	8.2291
ASD	82752345	0.0758848
ASD	82753345	0.919991
ASD	82754345	0.783451
ASD	82755345	0.471086
ASD	82756345	1.78356
ASD	82757345	1.76869
ASD	82758345	3.17901
ASD	82759345	0.434386
ASD	82760345	0.495331
ASD	82761345	0.291107
ASD	82762345	1.04033
ASD	82763345	1.36275
ASD	82764345	1.87646
ASD	82765345	2.27133
ASD	82766345	2.4756
ASD	82767345	2.85999
ASD	82768345	4.01051
ASD	82769345	5.60034
ASD	82770345	7.75725
ASD	82771345	10.35
ASD	82772345	13.1739
ASD	82773345	15.9446
ASD	82774345	18.6276
ASD	82775345	21.1224
ASD	82776345	23.3512
ASD	82777345	25.2242
ASD	82778345	26.6727
ASD	82779345	27.5554
ASD	82780345	27.7375
ASD	82781345	26.9636
ASD	82782345	24.8628
ASD	82783345	21.077
ASD	82784345	15.3224
ASD	82785345	7.15546
ASD	82786345	0.0097159
ASD	82787345	2.91259
ASD	82788345	0.7322
ASD	82789345	10.3185
ASW	82300257	4.16774
ASW	82301257	0.0430001
ASW	82302257	0.842361
ASW	82303257	1.8985
ASW	82304257	0.00327924
ASW	82305257	0.776046
ASW	82306257	0.00318994
ASW	82307257	0.234566
ASW	82308257	0.47012
ASW	82309257	0
ASW	82310257	0.0384827
ASW	82311257	0.628623
ASW	82312257	0.0853517
ASW	82313257	6.2604
ASW	82314257	3.72824
ASW	82315257	0.0748368
ASW	82316257	0.00447804
ASW	82317257	0
ASW	82318257	1.82312
ASW	82319257	0.110332
ASW	82320257	1.01577
ASW	82321257	4.14488
ASW	82322257	0.662188
ASW	82323257	0.141241
ASW	82324257	0.661666
ASW	82325257	0.0472436
ASW	82326257	0.108223
ASW	82327257	1.15979
ASW	82328257	12.4346
ASW	82329257	19.2337
ASW	82330257	6.04956
ASW	82331257	0.24009
ASW	82332257	0.0201999
ASW	82333257	0.0175561
ASW	82334257	0.00784318
ASW	82335257	0.751947
ASW	82336257	0
ASW	82337257	2.39694
ASW	82338257	10.2589
ASW	82339257	0.106805
ASW	82340257	9.11728
ASW	82341257	0.0415859
ASW	82342257	0
ASW	82343257	3.0262e-06
ASW	82344257	0.0145877
ASW	82345257	0.113529
ASW	82346257	0.725613
ASW	82347257	0
ASW	82348257	0.0173948
ASW	82349257	0.511787
ASW	82350257	0.0246858
ASW	82351257	0.00929973
ASW	82352257	6.84278
ASW	82353257	0.00163784
ASW	82354257	0.690822
ASW	82355257	0
ASW	82356257	0
ASW	82357257	0.0283895
ASW	82358257	0.214418
ASW	82359257	0.0404253
ASW	82360257	0.107148
ASW	82361257	0.184788
ASW	82362257	0.998036
ASW	82363257	0.0413612
ASW	82364257	0.00320617
ASW	82365257	0.120546
ASW	82366257	0.0861668
ASW	82367257	0.17412
ASW	82368257	1.1823
ASW	82369257	0.0171394
ASW	82370257	0.00832715
ASW	82371257	0.0876838
ASW	82372257	1.20112
ASW	82373257	1.34248
ASW	82374257	0.038277
ASW	82375257	0.000593279
ASW	82376257	0.0134952
ASW	82377257	16.8718
ASW	82378257	0.00556028
ASW	82379257	0.726582
ASW	82380257	1.19989
ASW	82381257	1.07495
ASW	82382257	0
ASW	82383257	0.107148
ASW	82384257	1.62261
ASW	82385257	0.0528674
ASW	82386257	0.00320617
ASW	82387257	0.017395
ASW	82388257	0.178692
ASW	82389257	0.193924
ASW	82390257	0.208399
ASW	82391257	8.70214
ASW	82392257	21.4469
ASW	82393257	2.0991
ASW	82394257	0.0189849
ASW	82395257	0.0955872
ASW	82396257	0
ASW	82397257	0
ASW	82398257	0.0325722
ASW	82399257	0.090219
ASW	82400257	0.250995
ASW	82401257	0.00746688
ASW	82402257	0.201157
ASW	82403257	0.393597
ASW	82404249	0.00320627
ASW	82405249	0.463855
ASW	82406249	0.382379
ASW	82407249	0
ASW	82408249	0.267991
ASW	82409249	0.903735
ASW	82410249	28.385
ASW	82411249	1.1931
ASW	82412249	0.679025
ASW	82413249	0.718636
ASW	82414249	0.187459
ASW	82415249	0.469068
ASW	82416249	0.0564308
ASW	82417249	5.70075e-05
ASW	82418249	0.629182
ASW	82419249	0.695073
ASW	82420249	0
ASW	82421249	0.204931
ASW	82422249	0.878272
ASW	82423249	0.65146
ASW	82424249	0
ASW	82425249	0.248631
ASW	82426249	0.120057
ASW	82427249	0.0971567
ASW	82428249	0.00150553
ASW	82429249	0.464494
ASW	82430249	0.432719
ASW	82431249	0.229631
ASW	82432249	0
ASW	82433249	0.502222
ASW	82434249	4.03824
ASW	82435249	0.689982
ASW	82436249	0
ASW	82437249	0.00447804
ASW	82438249	0.0430256
ASW	82439249	0.145589
ASW	82440249	0
ASW	82441249	0.00320617
ASW	82442249	0.0173948
ASW	82443249	0.692241
ASW	82444249	0.0521372
ASW	82445249	0.0575125
ASW	82446249	0.0415894
ASW	82447249	0.136866
ASW	82448249	3.99515
ASW	82449249	1.10439
ASW	82450249	0.0435932
ASW	82451249	2.39274
ASW	82452249	4.10651
ASW	82453249	0.0217371
ASW	82454249	0.0791138
ASW	82455249	0
ASW	82456249	0.295589
ASW	82457249	0.00714146
ASW	82458249	0.168231
ASW	82459249	0.0134952
ASW	82460249	0.0173948
ASW	82461249	0.0202875
ASW	82462249	0.972561
ASW	82463249	0.599111
ASW	82464249	6.15318
ASW	82465249	0.199387
ASW	82466249	1.15494
ASW	82467249	0.387799
ASW	82468249	0.263007
ASW	82469249	0.0946137
ASW	82470249	0.874992
ASW	82471249	1.83163
ASW	82472249	0.00195022
ASW	82473249	1.10258
ASW	82474249	0.374516
ASW	82475249	0.0864427
ASW	82476249	0.079483
ASW	82477249	1.02132
ASW	82478249	4.13424
ASW	82479249	0.406554
ASW	82480249	0.130178
ASW	82481249	0.0430102
ASW	82482249	1.69992
ASW	82483249	0.482365
ASW	82484249	0.380891
ASW	82485249	0.369324
ASW	82486249	0.141827
ASW	82487249	0.117346
ASW	82488249	0.0248174
ASW	82489249	0.00320617
ASW	82490249	1.26144
ASW	82491249	0.28747
ASW	82492249	0
ASW	82493249	0.184087
ASW	82494249	0
ASW	82495249	0.301086
ASW	82496249	0.491051
ASW	82497249	2.24682
ASW	82498249	0
ASW	82499249	1.21293
ASW	82500249	0.78978
ASW	82501249	0.0132058
ASW	82502249	0.00613216
ASW	82503249	0.0248174
ASW	82504249	0.0321307
ASW	82505249	0.0134952
ASW	82506249	0.895703
ASW	82507249	0
ASW	82508249	0.0139873
ASW	82509249	0.800338
ASW	82510249	5.87839
ASW	82511249	0.0332782
ASW	82512249	2.02312
ASW	82513249	0.401803
ASW	82514249	1.96719
ASW	82515249	0
ASW	82516249	1.67804
ASW	82517249	0.773676
ASW	82518249	0.00320712
ASW	82519249	0.228129
ASW	82520249	0.0206704
ASW	82521249	0.00791768
ASW	82522249	0.142466
ASW	82523249	0.0356711
ASW	82524249	0
ASW	82525249	0.256061
ASW	82526249	0.00323625
ASW	82527249	0.107807
ASW	82528249	0.00748214
ASW	82529249	0.539577
ASW	82530249	0.0554159
ASW	82531249	0.34712
ASW	82532249	2.07241
ASW	82533249	0.179846
ASW	82534249	2.41061e-06
ASW	82535249	0.275681
ASW	82536249	0.094911
ASW	82537249	0.181874
ASW	82538249	0.0678637
ASW	82539249	1.2004
ASW	82540249	0.618412
ASW	82541249	0.103362
ASW	82542249	0.275917
ASW	82543249	0.0430001
ASW	82544249	0.244775
ASW	82545249	0.0408289
ASW	82546249	0.0306435
ASW	82547249	0.807737
ASW	82548249	0.849025
ASW	82549249	0.00835277
ASW	82550249	0
ASW	82551249	0.18239
ASW	82552249	0.015245
ASW	82553249	0.139792
ASW	82554249	0.139424
ASW	82555249	0.605271
ASW	82556249	1.95997
ASW	82557249	0
ASW	82558249	0.0265327
ASW	82559249	0.546765
ASW	82560249	1.53229e-06
ASW	82561249	0.0538273
ASW	82562249	0.00320617
ASW	82563249	0.143049
ASW	82564249	0.499316
ASW	82565249	1.11297
ASW	82566249	0
ASW	82567249	0.00320617
ASW	82568249	0.740489
ASW	82569249	0.00320617
ASW	82570249	0.78044
ASW	82571249	0.00447804
ASW	82572249	0.00320618
ASW	82573249	2.04327
ASW	82574249	3.80802
ASW	82575249	5.25782
ASW	82576249	4.14294e-10
ASW	82577249	0.147773
ASW	82578249	0.00208659
ASW	82579249	0.0704749
ASW	82580249	0
ASW	82581249	0.0658931
ASW	82582249	0.037031
ASW	82583249	0.0217952
ASW	82584249	0.0251824
ASW	82585249	0.0532733
ASW	82586249	0.747954
ASW	82587249	0.00340848
ASW	82588249	0.00363535
ASW	82589249	0.340526
ASW	82590249	3.13405
ASW	82591249	0.00228237
ASW	82592249	2.52754e-05
ASW	82593249	0.00322928
ASW	82594249	0.272357
ASW	82595249	0.630041
ASW	82596249	0.107148
ASW	82597249	0.00391418
ASW	82598249	0.290691
ASW	82599249	0.170823
ASW	82600249	0
ASW	82601249	0.0477964
ASW	82602249	1.24509
ASW	82603249	0.38179
ASW	82604249	0.0206606
ASW	82605249	0
ASW	82606249	0
ASW	82607249	0.0150146
ASW	82608249	0.0802342
ASW	82609249	0.0649989
ASW	82610249	0
ASW	82611249	0.0105706
ASW	82612249	0.422024
ASW	82613249	0.140306
ASW	82614249	0.826664
ASW	82615249	0.463753
ASW	82616249	0.209242
ASW	82617249	0.0661427
ASW	82618249	2.55023
ASW	82619249	0
ASW	82620249	1.00873
ASW	82621249	3.35605
ASW	82622249	0.0247144
ASW	82623249	7.17539
ASW	82624249	0.00134519
ASW	82625249	6.56662
ASW	82626249	0.0348843
ASW	82627249	7.79974
ASW	82628249	4.51455
ASW	82629249	0.0173948
ASW	82630249	2.07127
ASW	82631249	0.692451
ASW	82632249	0
ASW	82633249	0
ASW	82634249	1.07161
ASW	82635249	0.0195466
ASW	82636249	0.351857
ASW	82637249	0.0134952
ASW	82638249	0.193709
ASW	82639249	0.132306
ASW	82640249	0.0134952
ASW	82641249	0.245681
ASW	82642249	0.841197
ASW	82643249	0.0202008
ASW	82644249	0
ASW	82645249	0.0592632
ASW	82646249	0
ASW	82647249	0.18079
ASW	82648249	0.013493
ASW	82649249	0.0365862
ASW	82650249	0.370783
ASW	82651249	0.034953
ASW	82652249	0.300878
ASW	82653249	0.39492
ASW	82654249	0.0107474
ASW	82655249	0.937111
ASW	82656249	0.057194
ASW	82657249	0.123842
ASW	82658249	0.2304
ASW	82659249	0.0155053
ASW	82660249	0.0661427
ASW	82661249	0.0149338
ASW	82662249	0
ASW	82663249	0.312308
ASW	82664249	0.24669
ASW	82665249	0.549842
ASW	82666249	0.139103
ASW	82667249	0.158332
ASW	82668249	0.564494
ASW	82669249	0.116908
ASW	82670249	0.348729
ASW	82671249	1.25072
ASW	82672249	0.140964
ASW	82673249	0.897306
ASW	82674249	1.37124
ASW	82675249	0
ASW	82676249	8.636
ASW	82677249	2.46562
ASW	82678249	0.612648
ASW	82679249	0.0338829
ASW	82680249	0.0751334
ASW	82681249	0.0560489
ASW	82682249	0.0483371
ASW	82683249	0.542299
ASW	82684249	1.44588
ASW	82685249	0.189073
ASW	82686249	0.832103
ASW	82687249	2.25154
ASW	82688249	0.440085
ASW	82689249	0.0184147
ASW	82690249	3.38924
ASW	82691249	0.078152
ASW	82692249	0.0762239
ASW	82693249	0.0450186
ASW	82694249	0.121585
ASW	82695249	0.369478
ASW	82696249	4.29559
ASW	82697249	0.461228
ASW	82698249	0.969694
ASW	82699249	0.283343
ASW	82700249	0
ASW	82701249	0.0100675
ASW	82702249	0.119405
ASW	82703249	0.115734
ASW	82704249	0.143068
ASW	82705249	0.134689
ASW	82706249	0.00320617
ASW	82707249	2.42171
ASW	82708249	0.703661
ASW	82709249	1.38367
ASW	82710249	0.114459
ASW	82711249	0.0347053
ASW	82712249	0.220251
ASW	82713249	0.303781
ASW	82714249	0.127721
ASW	82715249	1.28665
ASW	82716249	1.54504
ASW	82717249	3.294
ASW	82718249	0.00219565
ASW	82719249	0.87659
ASW	82720249	0.137216
ASW	82721249	0.00320617
ASW	82722249	0.884743
ASW	82723249	0
ASW	82724249	0.0237415
ASW	82725249	0.0134947
ASW	82726241	0.873911
ASW	82727241	0.00201687
ASW	82728241	0.0664804
ASW	82729241	0.771557
ASW	82730241	0.261986
ASW	82731241	0.279317
ASW	82732241	1.16264
ASW	82733241	0.652721
ASW	82734241	0.264593
ASW	82735241	0.001651
ASW	82736241	0.349976
ASW	82737241	2.00396
ASW	82738241	0.00337678
ASW	82739241	1.10876
ASW	82740241	0
ASW	82741241	8.58663
ASW	82742241	3.11554
ASW	82743241	0.516616
ASW	82744241	1.28361
ASW	82745241	0.0201999
ASW	82746241	0.154705
ASW	82747241	0.00320617
ASW	82748241	0.332742
ASW	82749241	0.492019
ASW	82750241	0.0467954
ASW	82751241	0.080234
ASW	82752241	0.0325339
ASW	82753241	0.0536415
ASW	82754241	0.014842
ASW	82755241	0.534386
ASW	82756241	0.130259
ASW	82757241	0.380933
ASW	82758241	0.625401
ASW	82759241	0.290433
ASW	82760241	0.104437
ASW	82761241	0.381725
ASW	82762241	0.195834
ASW	82763241	0.377693
ASW	82764241	0.366013
ASW	82765241	0.316277
ASW	82766241	0.265279
ASW	82767241	0.226981
ASW	82768241	0.197115
ASW	82769241	0.17184
ASW	82770241	0.134176
ASW	82771241	0.0692678
ASW	82772241	6.22478e-10
ASW	82773241	6.00634e-10
ASW	82774241	1.2476e-07
ASW	82775241	8.22554e-06
ASW	82776241	2.88836e-05
ASW	82777241	6.39302e-05
ASW	82778241	0.000102364
ASW	82779241	0.000199016
ASW	82780241	0.000339598
ASW	82781241	0.000531136
ASW	82782241	0.000622401
ASW	82783241	0.0236845
ASW	82784241	0.130836
ASW	82785241	0.188807
ASW	82786241	1.31194
ASW	82787241	5.23143e-06
ASW	82788241	0.199127
ASW	82789241	0.0409447
